# Supplementary material
Source: Elsevier journal article supplement (https://www.sciencedirect.com/science/article/pii/S1885585717303195)
Supplement: mmc1 [file S1885585717303195:mmc1.pdf]

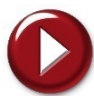

## Material suplementario

---

# Expresividad variable de una mutación fundadora en el gen *EIF2AK4* en pacientes con enfermedad venooclusiva pulmonar hereditaria. Impacto en la supervivencia

---

## Anexo 1. Variables de estudio

Se incluyeron los siguientes datos al diagnóstico: edad y sexo, fecha de diagnóstico, distancia recorrida en la prueba de la marcha de 6 min, clase funcional de la *New York Heart Association*, presión arterial pulmonar media, resistencia vascular pulmonar, gasto cardiaco, índice cardiaco y capacidad de difusión del monóxido de carbono. Se realizó test de vasorreactividad pulmonar según el protocolo de cada centro y se valoró la respuesta según las recomendaciones internacionales. Asimismo, se recogió también el retraso en el diagnóstico (tiempo desde el inicio de los síntomas hasta el diagnóstico), el último tratamiento recibido, la fecha de fallecimiento y causas, el código de trasplante pulmonar (urgente frente a electivo) y la necesidad de soporte con oxigenador extracorpóreo de membrana.

## Anexo 2. Metodología del estudio genético

Se extrajo ADN a partir de las muestras de sangre periférica usando el equipo Chemagen (Perkin Elmer, Alemania) y siguiendo las instrucciones del fabricante.

Se utilizaron las muestras de 5 pacientes con enfermedad venooclusiva pulmonar (EVOP) y se realizó un *microarray* de polimorfismos de nucleótido simple centrado en la detección de regiones con pérdida de heterocigosidad comunes a todos los pacientes. Se utilizó el *microarray* Cyto850K de Illumina siguiendo las especificaciones del fabricante. Los resultados se analizaron mediante el programa Genome Studio (Illumina, Estados Unidos). Las ratios obtenidas se normalizaron empleando el logaritmo en base 2 de los datos brutos y las gráficas se generaron utilizando la herramienta *genome viewer* del programa.

Posteriormente a la identificación de la región de interés, se genotipó un grupo de microsatélites para caracterizar el haplotipo que compartían todos los pacientes con EVOP de raza gitana y de origen ibérico. Para ello, se emplearon los siguientes microsatélites localizados en el cromosoma 15, flanqueando al gen *EIF2AK4*: *D15S1012*; *D15S143*; *D15S146*; *D15S161*; *D15S214*; *D15S971*; *D15S994*; *D15S1044*.

Se realizó la secuenciación de los 39 exones y las regiones flanqueantes intrón-exón del gen *EIF2AK4* mediante amplificación-PCR y secuenciación Sanger en 5 muestras; inicialmente utilizando como referencia el transcrito NM\_001013703. Las secuencias se analizaron utilizando el programa Sequencher v.4.1.4 (GeneCodes, Estados Unidos). Tras la identificación de la mutación común en la etnia gitana en este grupo inicial, se realizó la secuenciación de este exón en todos los pacientes de etnia gitana con diagnóstico clínico de EVOP.

### **Anexo 3. Metodología del estudio anatomopatológico**

#### *Estudio macroscópico*

Se ha contado con muestras histológicas procedentes de piezas de neumonectomía de pulmones receptores-nativos de los pacientes con sospecha de EVOP. Las piezas se insuflan y se fijan en formol tamponado durante un mínimo de 24 h y un máximo de 48 h. Posteriormente, las piezas de neumonectomía se tallan siguiendo un protocolo por el cual se aíslan los bordes quirúrgicos de resección tanto vasculares como bronquiales y se toman para estudio todos los ganglios hiliares evidenciables. Después se toman cortes representativos para estudio histológico de todos los lóbulos pulmonares, tratando de identificar áreas de distinta consistencia macroscópicamente. Toda zona que presente al estudio macroscópico de la pieza alguna alteración se incluye para estudio histológico.

#### *Estudio microscópico*

Los cortes se tiñen con hematoxilina-eosina y se realizan técnicas de tinción histoquímica para elásticas (Orceína), así como Masson para identificar áreas de fibrosis intersticial y perivascular.

## Anexo 4. Resultados del cribado mutacional

El estudio genético reveló en los 9 probandos iniciales una variante en homocigosis en el gen *EIF2AK4* (c.3344C>T(p.Pro1115Leu)).

Pro1115 se encuentra localizado en la región similar a la sintetasa Histidil-ARNt de EIF2AK4 (aminoácidos 1022-1493). Esta región está implicada en la regulación de la actividad catalítica de la proteína mediante la interacción con ARNts. El aminoácido Pro1115 se encuentra altamente conservado en la evolución. El cambio p.Pro1115Leu produce modificaciones moderadas en las propiedades fisicoquímicas de la proteína (Distancia Grantham: 98). Los predictores bioinformáticos clasifican esta variante como deletérea (SIFT, Polyphen, Mutation Taster). p.Pro1115Leu no se encuentra indicada en 1.000 genomas, EVS (*Exome Variant Server*) y se encuentra indicada con una frecuencia muy baja en el ExAC (*Exome Aggregation Consortium*) (1/120644 alelos), considerándose su frecuencia compatible con la de una mutación ([tabla del material suplementario](#)).

## Anexo 5. Resultados del estudio anatomopatológico

El estudio microscópico de las piezas de neumonectomía de 6 pacientes de los 8 pacientes estudiados (1.I, 1.II, 1.III, 1.IV, 2.1 y 9.I) pertenecientes a 3 familias (familia 1, 2 y 9) muestra una mayor afección histológica. No se observaron alteraciones relevantes del parénquima pulmonar con una arquitectura que no presentan grandes agregados inflamatorios ni marcada fibrosis; donde las lesiones más llamativas se centran en la trama vascular y consisten en engrosamiento concéntrico intimal de las arterias pulmonares de pequeño calibre. También se observa fibrosis intimal de aspecto obstructivo en las vénulas poscapilares en los septos alveolares. Los septos alveolares se encuentran engrosados y se identifican venas remodeladas dentro de los septos. El engrosamiento septal corresponde en gran parte a hemangiomatosis capilar. Dentro de los alveolos hay una masiva población macrofágica cargada de hemosiderina. Los hallazgos histológicos son congruentes con un patrón de EVOP en fase muy establecida ([figura 4A1](#) y [figura 4A2](#)). En el caso de los pacientes 3.I y 3.II, pertenecientes a la familia 3, se observa una menor afección histológica y se identifica remodelación de la trama vascular arterial pulmonar, pero menos llamativa. Las venas pulmonares presentan pared fibrótica comparable a los casos más afectados y las vénulas muestran obstrucción parcial. Las áreas de fibrosis intersticial son menores y menos llamativas. Es sugestiva la muscularización de los microvasos (arteriolas y/o vénulas). El patrón histológico es menos evolucionado y correspondería a una forma menos avanzada de EVOP ([figura 4B1](#) y [figura 4B2](#)).

Tabla del material suplementario

Frecuencia alélica y predictores bioinformáticos para la variante p.Pro1115Leu

|               | mAf (poblaciones) |                  |                      | Predictores        |                                  |                                  |
|---------------|-------------------|------------------|----------------------|--------------------|----------------------------------|----------------------------------|
|               | EVS               | 1.000<br>genomas | ExAC                 | SIFT               | POLYPHEN 2                       | Mutation Taster                  |
| p.Pro1115L eu | 0                 | 0                | < 0,01<br>(1/120644) | 0<br>(perjudicial) | 1 (probablemente<br>perjudicial) | 1 (probablemente<br>perjudicial) |

mAF: frecuencia del alelo menor; EVS: *Exome Variant Server*; ExaC: *Exome Agregation Consortium*.

**Figura 1 del material suplementario.** Árbol genealógico de la familia afectada 1.

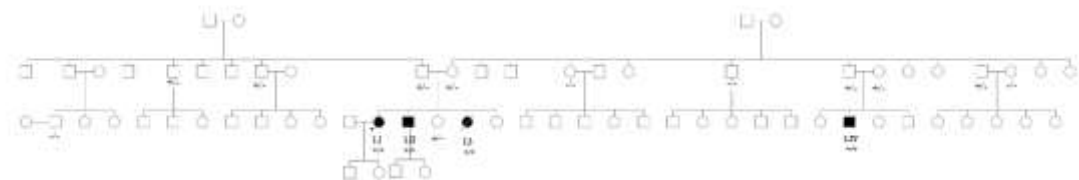

**Figura 2 del material suplementario.** Árbol genealógico de la familia afectada 2.

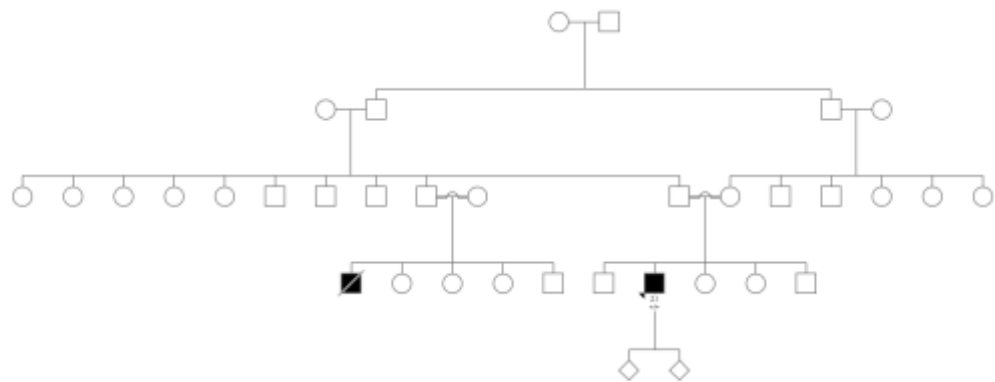

**Figura 3 del material suplementario.** Árbol genealógico de la familia afectada 3.

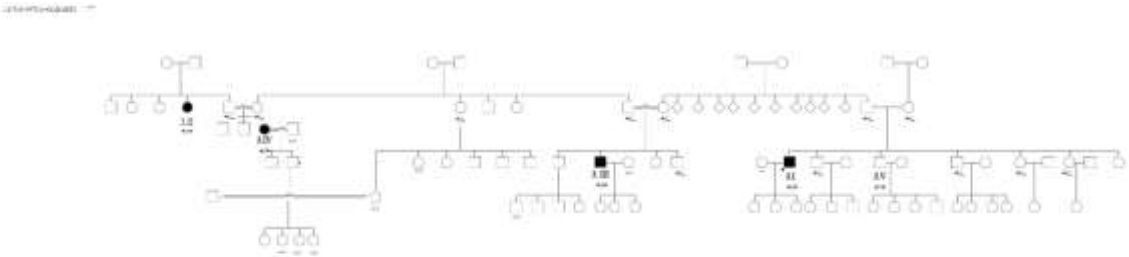

**Figura 4 del material suplementario.** Árbol genealógico de la familia afectada 4.

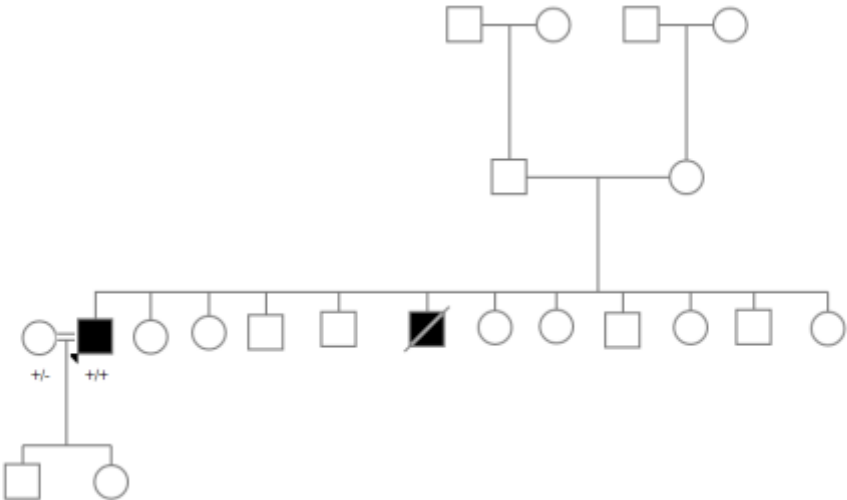



**Figura 5 del material suplementario.** Árbol genealógico de la familia afectada 5.

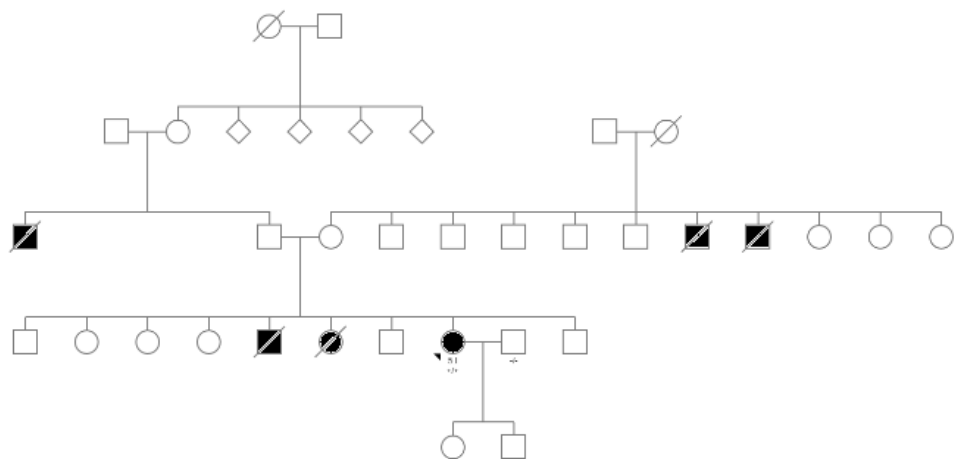

**Figura 6 del material suplementario.** Árbol genealógico de la familia afectada 6.

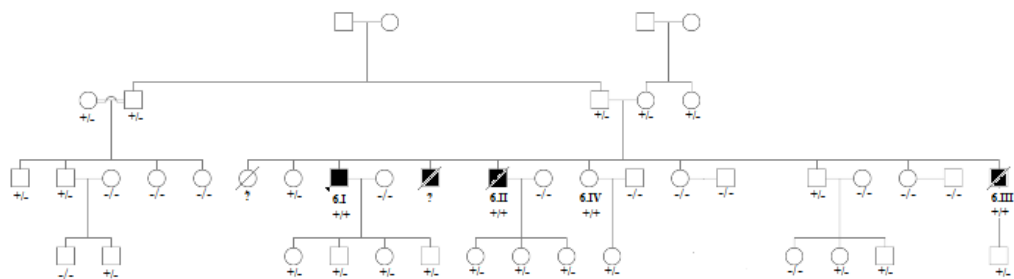

**Figura 7 del material suplementario.** Árbol genealógico de la familia afectada 7.

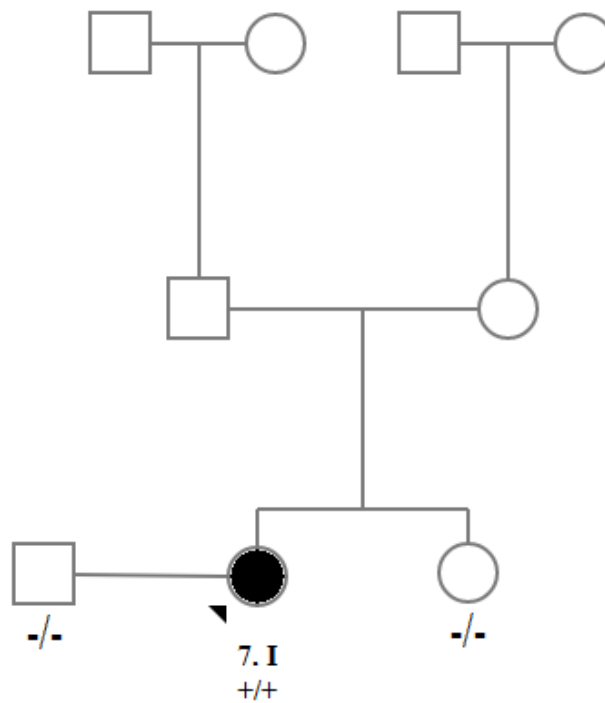

**Figura 8 del material suplementario.** Árbol genealógico de la familia afectada 8.

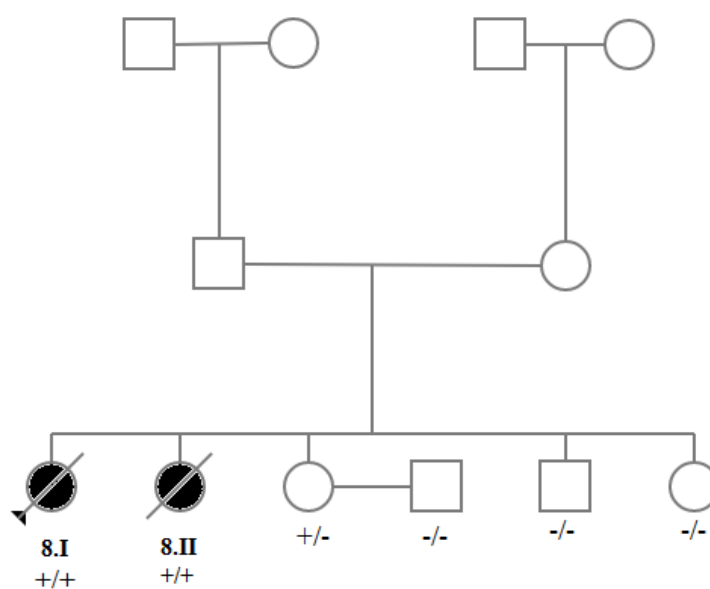

**Figura 9 del material suplementario.** Árbol genealógico de la familia afectada 9.

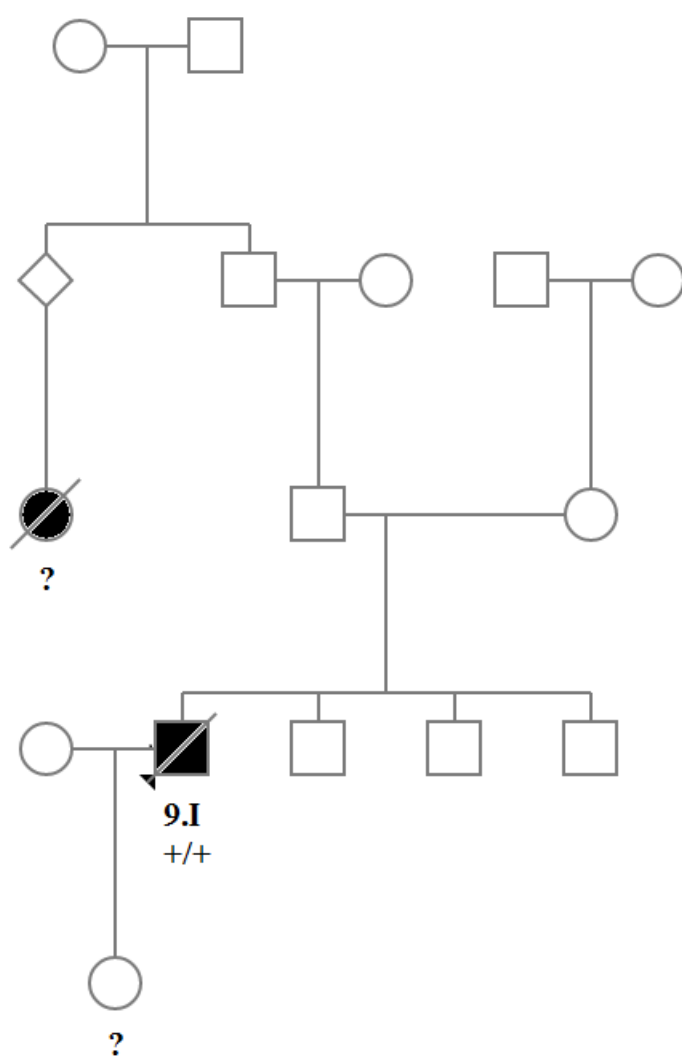

## Leyendas figuras 1-9

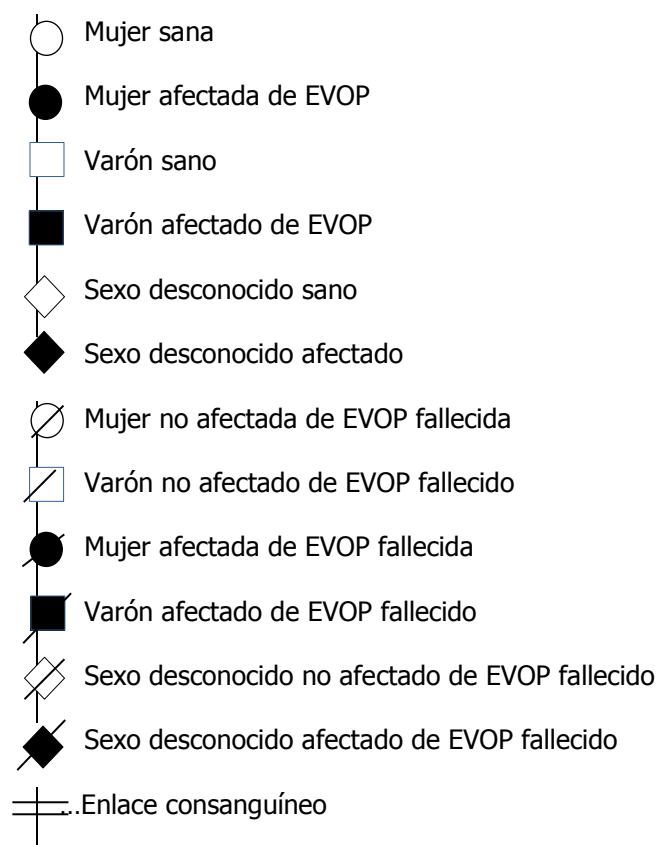

-/- : no portador de mutaciones en el gen *EIF2AK4*; +/- portador en heterocigosis de mutaciones en el gen *EIF2AK4*; +/+ : portador de mutaciones en homocigosis en el gen *EIF2AK4*.
